# Supplementary material for: Detecting cocaine use? The autobiographical implicit association test (aIAT) produces false positives in a real-world setting
Source: PubMed Central journal article supplement (PMC3685584; doi:10.1186/1747-597x-8-22), 2013-06-14
Supplement: 1747-597X-8-22-S1.pdf [file 1747-597X-8-22-S1.pdf]

**Italian translation of the category labels and stimuli of the brief cocaine- and heroin-  
aIATs**

| Items for Attribute A ‘Vere’:                                 | Items for Attribute B ‘False’:                                                                 |
|---------------------------------------------------------------|------------------------------------------------------------------------------------------------|
| 1 Mi trovo a Londra                                           | 1 Sto scalando una montagna                                                                    |
| 2 Sto facendo un test                                         | 2 Sono al mare                                                                                 |
| 3 Sono davanti al PC                                          | 3 Gioco a calcio                                                                               |
| 4 Guardo uno schermo                                          | 4 Mi trovo in un negozio                                                                       |
| Items for Target A ‘come se fossi un consumatore di cocaina’: | Items for Target B ( <i>negative</i> sentences) ‘come se non fossi un consumatore di cocaina’: |
| 1 Ho usato cocaina recentemente                               | 1 Io non uso cocaina                                                                           |
| 2 Consumo cocaina                                             | 2 Non ho mai provato cocaina                                                                   |
| 3 Ho sniffato cocaina con i miei amici                        | 3 Non sniffo cocaina                                                                           |
| 4 I uso cocaina                                               | 4 Non uso cocaina con i miei amici                                                             |
|                                                               | Items for Target B ( <i>affirmative</i> sentences) ‘come se ti astenessi da usare cocaina’:    |
|                                                               | 1 Sono libero dall’uso di cocaina                                                              |
|                                                               | 2 Mi tengo lontano dalla cocaina                                                               |
|                                                               | 3 Rispetto la legge sulla cocaina                                                              |
|                                                               | 4 Evito la cocaina                                                                             |
| Items for Target A ‘come se fossi un consumatore di eroina’:  | Items for Target B ‘Come se ti astenessi da usare eroina’:                                     |
| 1 Ho usato eroina recentemente                                | 1 Sono libero dall’uso di eroina                                                               |
| 2 Consumo eroina                                              | 2 Mi tengo lontano dall’eroina                                                                 |

3 Ho sniffato eroina con i miei amici

3 Rispetto la legge sull'eroina

4 I uso eroina

4 Evito l'eroina

---
