# Supplementary material for: Detecting cocaine use? The autobiographical implicit association test (aIAT) produces false positives in a real-world setting
Source: PubMed Central journal article supplement (PMC3685584; doi:10.1186/1747-597x-8-22), 2013-06-14
Supplement: 1747-597X-8-22-S2.pdf [file 1747-597X-8-22-S2.pdf]

**Detailed statistical analysis for language, gender and typology differences**

Table S.1.

*Means ± SD for language, test type and gender differences*

| Typology     | Random factors | N           | Study 1: Brief cocaine-aIAT |                   | N              | Study 2: Brief heroin-aIAT |                |
|--------------|----------------|-------------|-----------------------------|-------------------|----------------|----------------------------|----------------|
|              |                |             | Latency (ms)                | D score           |                | Latency (ms)               | D score        |
| Cocaine user | Negative       | Italian     | 4                           | 2294.32 ± 217.66  | 0.373 ± 0.063  | -                          | -              |
|              |                | English     | 5                           | 2108.07 ± 753.85  | 0.133 ± 0.278  | -                          | -              |
|              | Affirmative    | Italian     | 12                          | 2817.94 ± 2680.06 | 0.239 ± 0.270  | -                          | -              |
|              |                | English     | 2                           | 1636.64 ± 525.11  | 0.441 ± 0.064  | -                          | -              |
|              | Negative       | Male        | 6                           | 2160.58 ± 323.34  | 0.363 ± 0.132  | -                          | -              |
|              |                | Female      | 3                           | 2251.38 ± 988.21  | -0.005 ± 0.213 | -                          | -              |
|              | Affirmative    | Male        | 11                          | 2787.31 ± 2832.00 | 0.198 ± 0.244  | -                          | -              |
|              |                | Female      | 3                           | 2142.73 ± 498.22  | 0.525 ± 0.125  | -                          | -              |
|              | Total          | Negative    | 9                           | 2190.85 ± 558.16  | 0.240 ± 0.237  | -                          | -              |
|              |                | Affirmative | 14                          | 2649.18 ± 2506.57 | 0.268 ± 0.260  | -                          | -              |
| Grand total  | Italian        | 16          | 2687.03 ± 2309.03           | 0.273 ± 0.241     | 4              | 1526.42 ± 190.98           | -0.186 ± 0.297 |
|              | English        | 7           | 1973.38 ± 691.18            | 0.221 ± 0.273     | 6              | 1556.73 ± 305.94           | -0.063 ± 0.292 |
|              | Male           | 17          | 2566.11 ± 2267.29           | 0.256 ± 0.222     | 6              | 1501.52 ± 239.42           | -0.138 ± 0.311 |
|              | Female         | 6           | 2197.06 ± 702.46            | 0.25994±0.329261  | 4              | 1609.25 ± 297.29           | -0.074 ± 0.279 |
|              | Grand total    | 23          | 2469.83 ± 1969.32           | 0.25701±0.245947  | 10             | 1544.61 ± 253.77           | -0.112 ± 0.284 |

| Typology    | Random factors | N       | Study 1: Brief cocaine-aIAT |                  | N              | Study 2: Brief heroin-aIAT |                |
|-------------|----------------|---------|-----------------------------|------------------|----------------|----------------------------|----------------|
|             |                |         | Latency (ms)                | D score          |                | Latency (ms)               | D score        |
| Non-user    | Negative       | Italian | 1                           | 2011.09          | -0.003         | -                          | -              |
|             |                | English | 9                           | 2050.06 ± 661.10 | 0.142 ± 0.288  | -                          | -              |
|             | Affirmative    | Italian | 3                           | 1779.08 ± 594.68 | -0.009 ± 0.646 | -                          | -              |
|             |                | English | 10                          | 1392.18 ± 325.15 | 0.182 ± 0.388  | -                          | -              |
|             | Negative       | Male    | 1                           | 2011.09          | -0.003         | -                          | -              |
|             |                | Female  | 9                           | 2050.06 ± 661.10 | 0.142 ± 0.289  | -                          | -              |
|             | Affirmative    | Male    | 7                           | 1420.47 ± 174.19 | -0.077 ± 0.392 | -                          | -              |
|             |                | Female  | 6                           | 1552.63 ± 594.26 | 0.389 ± 0.361  | -                          | -              |
| Total       | Negative       | 10      | 2046.17 ± 623.41            | 0.128 ± 0.276    | -              | -                          |                |
|             | Affirmative    | 13      | 1481.46 ± 408.68            | 0.138 ± 0.435    | -              | -                          |                |
|             | Italian        | 4       | 1837.08 ± 499.22            | -0.007 ± 0.527   | 4              | 1490.77 ± 244.82           | -0.026 ± 0.493 |
|             | English        | 19      | 1703.81 ± 600.83            | 0.164 ± 0.336    | 9              | 1512.69 ± 500.95           | 0.026 ± 0.451  |
|             | Male           | 8       | 1494.29 ± 263.84            | -0.067 ± 0.364   | 4              | 1417.33 ± 291.78           | 0.072 ± 0.524  |
|             | Female         | 15      | 1851.09 ± 662.94            | 0.241 ± 0.331    | 9              | 1545.33 ± 485.80           | -0.018 ± 0.436 |
| Grand total |                | 23      | 1726.99 ± 576.21            | 0.134 ± 0.367    | 13             | 1505.94 ± 427.08           | 0.010 ± 0.444  |

Table S.2.

*Test statistics (F, p) for language, test type and gender differences*

| Models <sup>a</sup> | Study 1: Brief cocaine-aIAT latency (ms) |       |                    |                      | Study 1: Brief cocaine-aIAT D score |       |                    |                      |
|---------------------|------------------------------------------|-------|--------------------|----------------------|-------------------------------------|-------|--------------------|----------------------|
|                     | F                                        | p     | Partial $\eta^2$   | Main effect $\eta^2$ | F                                   | p     | Partial $\eta^2$   | Main effect $\eta^2$ |
| Model 1             |                                          |       |                    |                      |                                     |       |                    |                      |
| Typology            | 0.069                                    | 0.836 | 0.065              | 0.002                | 0.013                               | 0.927 | 0.013              | < 0.001              |
| Language            | 1.770                                    | 0.410 | 0.639 <sup>a</sup> |                      | 0.398                               | 0.642 | 0.285 <sup>a</sup> |                      |
| Typology * Language | 1.135                                    | 0.293 | 0.026              |                      | 0.869                               | 0.356 | 0.020              |                      |
| Model 2             |                                          |       |                    |                      |                                     |       |                    |                      |
| Typology            | 0.252                                    | 0.704 | 0.201              | 0.001                | 0.040                               | 0.874 | 0.038              | 0.008                |
| Gender              | 1.360                                    | 0.451 | 0.576              |                      | 0.064                               | 0.843 | 0.060              |                      |
| Typology * Gender   | 0.240                                    | 0.627 | 0.006              |                      | 8.994                               | 0.005 | 0.176              |                      |
| Language * Gender   | 0.800                                    | 0.376 | 0.019              |                      | 1.014                               | 0.320 | 0.024              |                      |
| Status * Language * | 0.170                                    | 0.682 | 0.004              |                      | 0.354                               | 0.555 | 0.009              |                      |
| Gender <sup>b</sup> |                                          |       |                    |                      |                                     |       |                    |                      |

<sup>a</sup> Italian version is more verbose compared to the English, which was expected to have effect on latency but not the D scores.

<sup>b</sup> Due to the small sample size in some cells, three way interaction effect with typology cannot be tested. Owing to random sampling variation, cocaine users were dominantly Italian speaking males (14/23) whereas controls were dominantly English speaking females (13/23); with strength of language and gender associations for cocaine users and controls, respectively as  $\chi^2 = 5.033$ , Fisher's exact p = 0.045 and  $\chi^2 = 0.494$ , Fisher's exact p = 0.589.
