# Supplementary material for: Detecting cocaine use? The autobiographical implicit association test (aIAT) produces false positives in a real-world setting
Source: PubMed Central journal article supplement (PMC3685584; doi:10.1186/1747-597x-8-22), 2013-06-14
Supplement: 1747-597X-8-22-S3.pdf [file 1747-597X-8-22-S3.pdf]

### Curve parameters of the ROC analysis

| Probabilities of membership<br>in the cocaine user group | Positive if cocaine aIAT<br>D ≥ | Sensitivity | 1 - Specificity |
|----------------------------------------------------------|---------------------------------|-------------|-----------------|
| .0000000                                                 | -1.61716                        | 1.000       | 1.000           |
| .2809582                                                 | -0.54906                        | 1.000       | .957            |
| .3336634                                                 | -0.35496                        | 1.000       | .913            |
| .3696441                                                 | -0.22674                        | .957        | .913            |
| .3723334                                                 | -0.21763                        | .957        | .870            |
| .3762443                                                 | -0.20442                        | .957        | .826            |
| .3840184                                                 | -0.17838                        | .913        | .826            |
| .3942584                                                 | -0.14429                        | .913        | .783            |
| .4046764                                                 | -0.10996                        | .913        | .739            |
| .4125723                                                 | -0.08408                        | .913        | .696            |
| .4203608                                                 | -0.05877                        | .913        | .652            |
| .4279598                                                 | -0.03413                        | .870        | .652            |
| .4304457                                                 | -0.02610                        | .826        | .652            |
| .4344294                                                 | -0.01328                        | .783        | .652            |
| .4489143                                                 | 0.03310                         | .783        | .609            |
| .4604940                                                 | 0.07012                         | .739        | .609            |
| .4627041                                                 | 0.07715                         | .739        | .565            |
| .4661165                                                 | 0.08800                         | .739        | .522            |
| .4709238                                                 | 0.10326                         | .696        | .522            |
| .4756539                                                 | 0.11827                         | .696        | .478            |
| .4810067                                                 | 0.13523                         | .696        | .435            |
| .4865521                                                 | 0.15280                         | .652        | .435            |
| .4984829                                                 | 0.19054                         | .652        | .391            |
| .5117205                                                 | 0.23243                         | .609        | .391            |
| .5157004                                                 | 0.24502                         | .565        | .391            |
| .5223693                                                 | 0.26616                         | .565        | .348            |
| .5308779                                                 | 0.29314                         | .522        | .348            |
| .5338631                                                 | 0.30262                         | .478        | .348            |
| .5405346                                                 | 0.32387                         | .435        | .348            |
| .5490429                                                 | 0.35098                         | .435        | .304            |
| .5517494                                                 | 0.35962                         | .391        | .304            |
| .5552606                                                 | 0.37086                         | .391        | .261            |
| .5604352                                                 | 0.38745                         | .348        | .261            |
| .5648233                                                 | 0.40155                         | .304        | .261            |
| .5683540                                                 | 0.41292                         | .304        | .217            |
| .5756629                                                 | 0.43656                         | .261        | .217            |
| .5861188                                                 | 0.47052                         | .217        | .217            |
| .5977264                                                 | 0.50856                         | .174        | .217            |
| .6048666                                                 | 0.53205                         | .174        | .174            |

|           |         |      |      |
|-----------|---------|------|------|
| .6052715  | 0.53339 | .130 | .174 |
| .6070654  | 0.53934 | .087 | .174 |
| .6108586  | 0.55194 | .087 | .130 |
| .6135871  | 0.56102 | .087 | .087 |
| .6263498  | 0.60413 | .043 | .087 |
| .6419349  | 0.65701 | .000 | .087 |
| .6709382  | 0.76054 | .000 | .043 |
| 1.0000000 | 1.85208 | .000 | .000 |

---
